# Supplementary material for: High-quality Ge-rich SiGe thin films epitaxially grown on Si at low temperature by a two-step approach
Source: Royal Society of Chemistry journal article supplement (doi:10.1039/c9ce00948e), 2019-01-01
Supplement: c9ce00948e1.pdf [file c9ce00948e1.pdf]

Low-temperature epitaxial growth of SiGe thin film on silicon substrate by Reactive Thermal CVD

As shown in Fig. s1,  $\text{Si}_2\text{H}_6$ ,  $\text{GeF}_4$  and He are used as source gases, in which,  $\text{GeF}_4$  is selected as the Ge source material and  $\text{Si}_2\text{H}_6$  is used as the reductant gas. He is the carrier gas. The redox reaction between  $\text{Si}_2\text{H}_6$  and  $\text{GeF}_4$  will happen when they arrive at the silicon substrate, and Ge layer incorporated with some Si atoms will be deposited on the substrate. This deposition exhibits selective growth characteristics. The rate of the redox reaction is mainly controlled by the gas flow ratio between  $\text{Si}_2\text{H}_6$  and  $\text{GeF}_4$ , the gas pressure and the substrate temperature. Here, the redox reaction can only take place when the substrate temperature reaches a certain value (the optimum value locates in between 300~375°C). If the substrate temperature is lower than this threshold, no film can be grown. On the other hand, if the substrate is much higher than this threshold (e.g. 400°C), pyrolysis of  $\text{Si}_2\text{H}_6$  will happen. In this case, the selective growth will be suppressed and many silicon atoms will incorporate into the film, resulting in a poor crystalline quality.

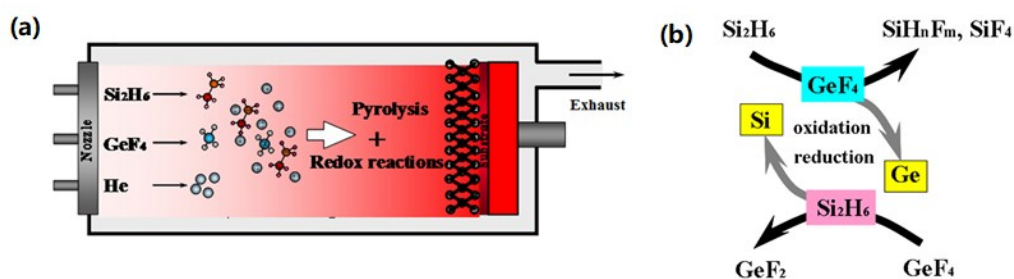

Fig. s1 (a) the sketch map of Reactive Thermal CVD and (b) the redox reaction between  $\text{Si}_2\text{H}_6$  and  $\text{GeF}_4$

During the redox reaction,  $\text{Si}_2\text{H}_6$  is oxidized into  $\text{SiH}_n\text{F}_m$  or  $\text{SiF}_4$ , and  $\text{GeF}_4$  is reduced into  $\text{GeF}_2$ . In this reaction system,  $\text{GeF}_4$  shows three important characters: firstly, it reacts with  $\text{Si}_2\text{H}_6$ , and contributes to the deposition of Ge, as shown in Fig. s2. Secondly, it can react with silicon atoms which incorporates into the film surface, as a result, Si is substituted by Ge and the component of Si in the epilayer decreases. Thirdly,  $\text{GeF}_4$  can react with Ge atoms and generated  $\text{GeF}_2$ , which can easily move away from the growth surface. During this process, the weak bonds between atoms are broken and atoms re-structure on the surface, which can suppress the three-dimensional growth and promote the structural relaxation of the film network. The latter two surface chemical reactions can assist the improvement of film quality.

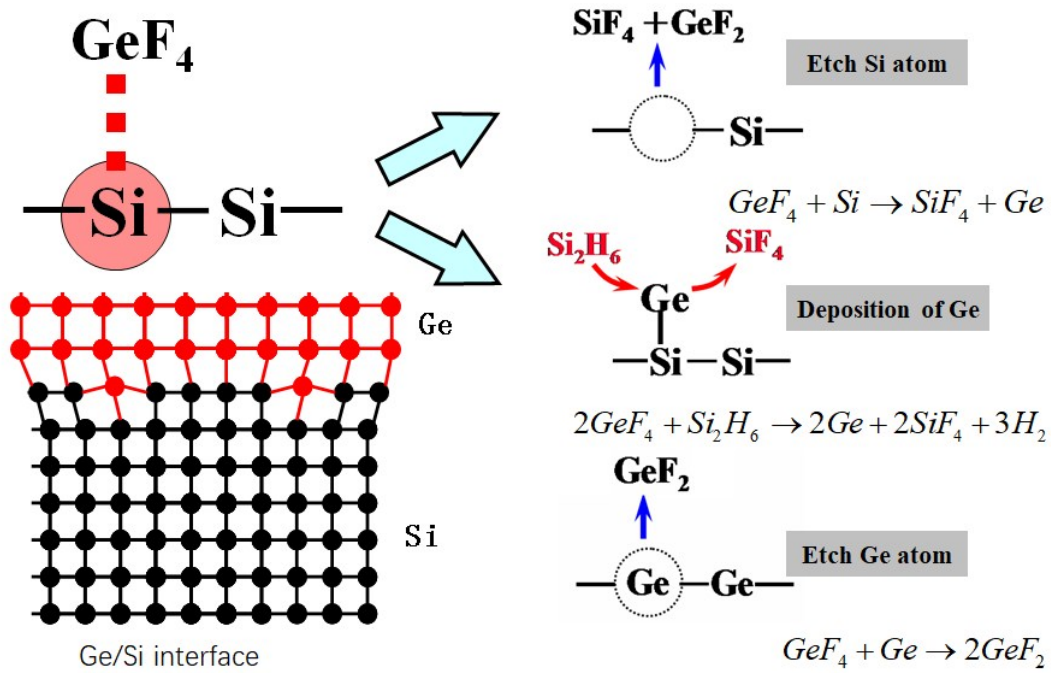

Fig. s2 the schematic drawing for the epitaxial growth mechanism of RTCVD
